# Supplementary material for: Dual-functional semiconductor-decorated upconversion hollow spheres for high efficiency dye-sensitized solar cells
Source: Royal Society of Chemistry journal article supplement (doi:10.1039/c5ta06238a), 2015-01-01
Supplement: c5ta06238a1.pdf [file c5ta06238a1.pdf]

**Supporting Information**

**Dual-Functional Semiconductor-Decorated Upconversion Hollow Spheres  
for High Efficiency Dye-Sensitized Solar Cells**

*Wenming Liao,<sup>1,2</sup> Dajiang Zheng,<sup>1</sup> Jianhua Tian,<sup>2\*</sup> and Zhiqun Lin<sup>1\*</sup>*

<sup>1</sup>School of Materials Science and Engineering, Georgia Institute of Technology, Atlanta, GA 30332.

<sup>2</sup>School of Chemical Engineering and Technology, Tianjin University, Tianjin, China 30072

\*To whom correspondence should be addressed. Email: [jhtian@tju.edu.cn](mailto:jhtian@tju.edu.cn) and [zhiqun.lin@mse.gatech.edu](mailto:zhiqun.lin@mse.gatech.edu)

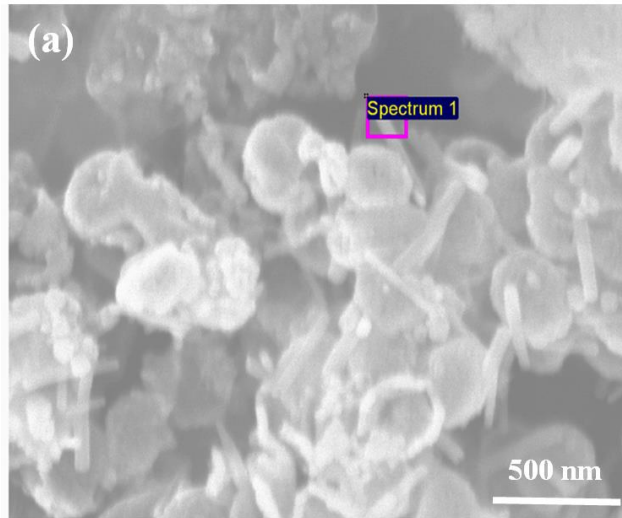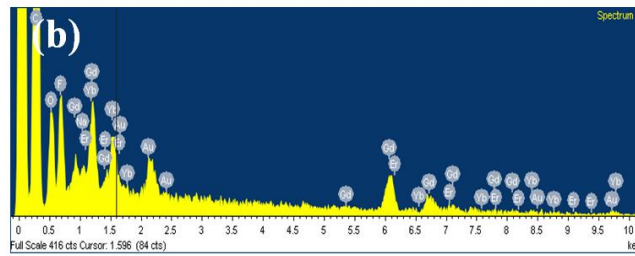

| Element | Atomic% |
|---------|---------|
| C K     | 81.41   |
| O K     | 9.22    |
| F K     | 7.30    |
| Na K    | 0.21    |
| Gd L    | 1.34    |
| Er L    | 0.03    |
| Yb L    | 0.26    |
| Au M    | 0.25    |
| Totals  |         |

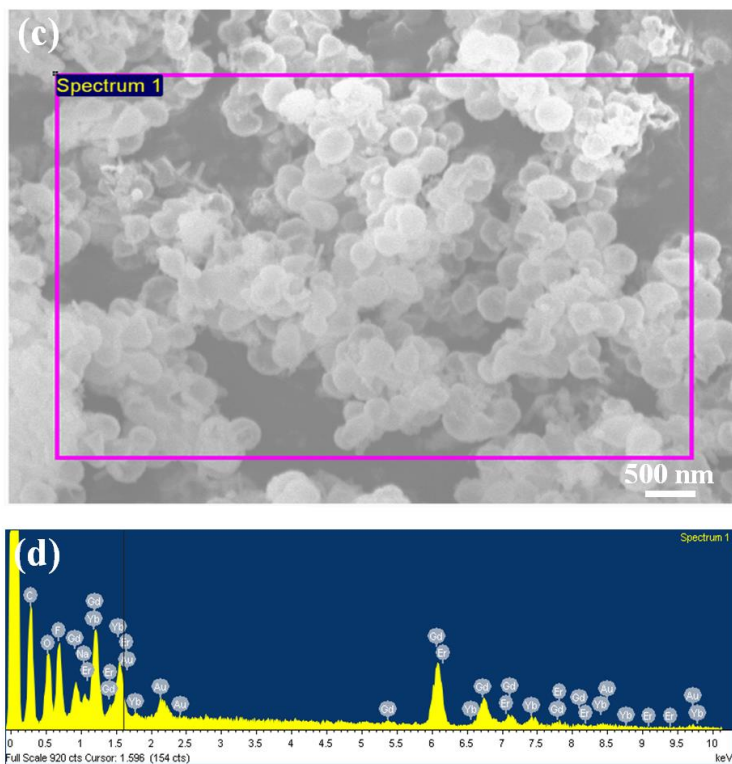

| Element | Atomic% |
|---------|---------|
| C K     | 54.84   |
| O K     | 17.37   |
| F K     | 16.68   |
| Na K    | 0.83    |
| Gd L    | 7.68    |
| Er L    | 0.28    |
| Yb L    | 1.78    |
| Au M    | 0.55    |
| Totals  |         |

**Figure S1.** EDS analysis on (a-b) the nanorod on the surface of  $\text{Na}_x\text{GdF}_y\text{O}_z:\text{Yb/Er}$  hollow spheres, and (c-d)  $\text{Na}_x\text{GdF}_y\text{O}_z:\text{Yb/Er}$  hollow spheres. The ratio of Gd, Yb, Er, F and O in both nanorod and  $\text{Na}_x\text{GdF}_y\text{O}_z:\text{Yb/Er}$  hollow spheres is the same.

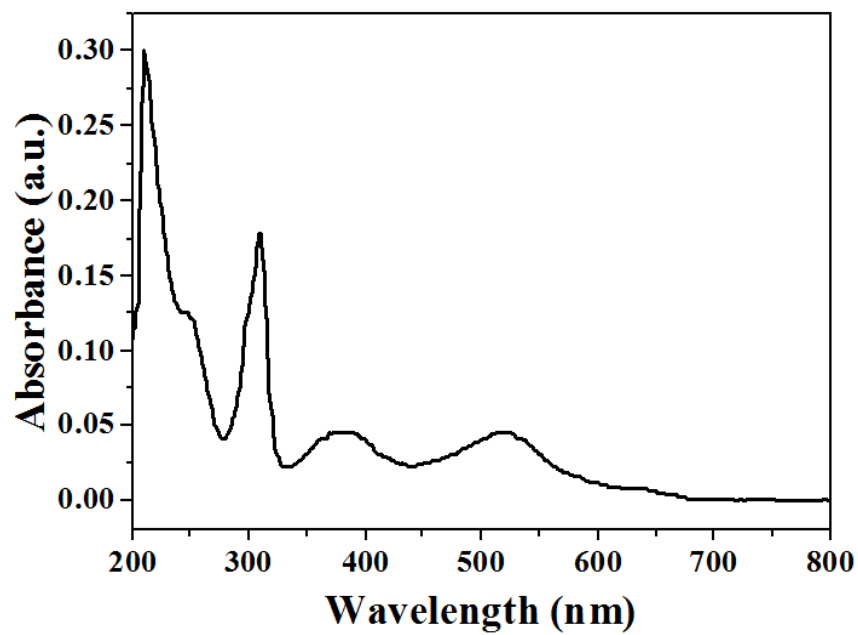

**Figure S2.** UV-vis spectrum of N719 dye in ethanol. Two main absorption maxima in the visible light range are at 380nm and 512nm, respectively.

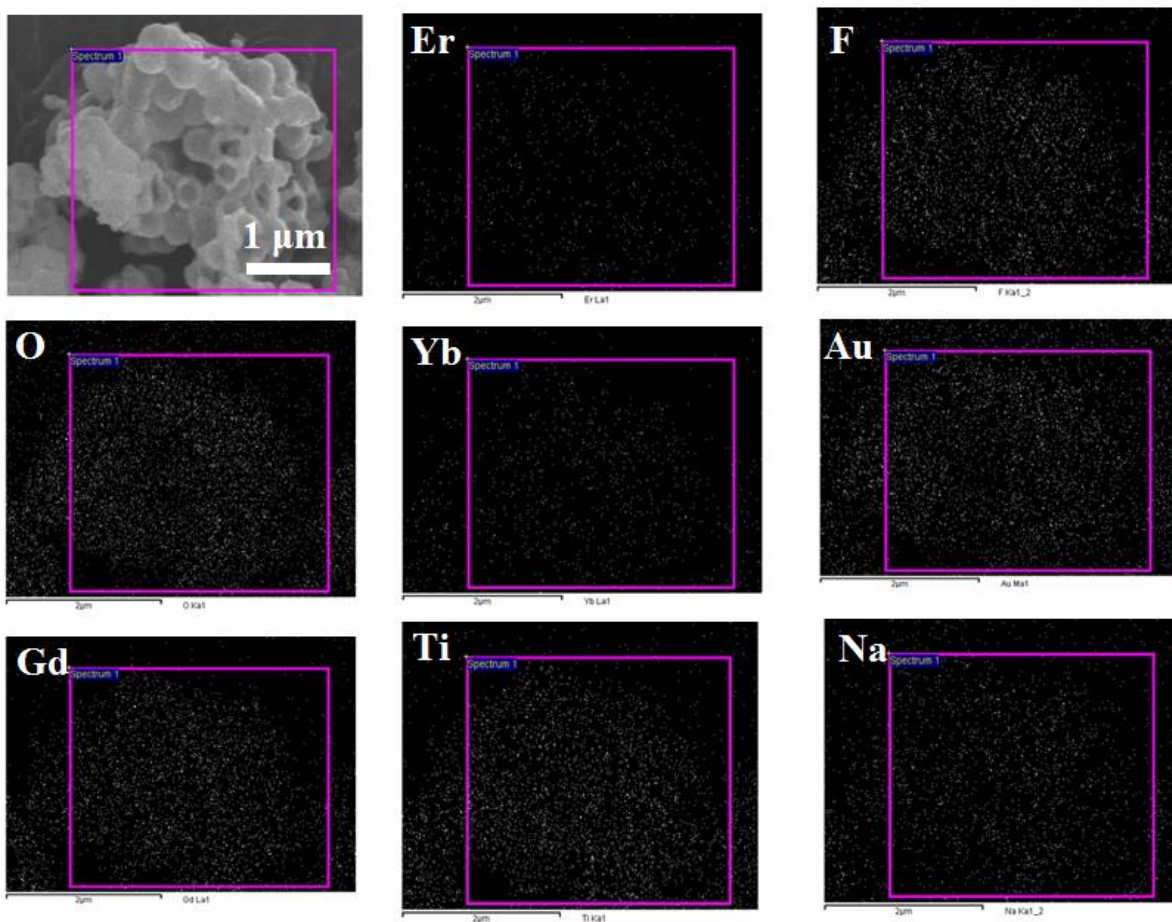

**Figure S3.** EDS mapping of  $\text{Na}_x\text{GdF}_y\text{O}_z:\text{Yb/Er}@ \text{TiO}_2$  submicron hollow spheres.
